# Supplementary material
Source: publisher site journal article supplement (https://www.dovepress.com/get_supplementary_file.php?f=335864.docx)
Supplement: Supplementary file 1 [file get_supplementary_file.php]

**Supplemental material**

*Table S1 Number of* *bacteria with ARGs positive cases in different types of sample*

| **Sample types** | **No. of bacteria with ARGs negative cases** | **No. of bacteria with ARGs positive cases** | **No. of single bacteria with ARGs** | **No. of 2 bacteria with ARGs** | **No. of 3 bacteria with ARGs** | **No. of 4 or more bacteria with ARGs** |
| --- | --- | --- | --- | --- | --- | --- |
| BALF | 140 | 140 | 76 | 37 | 19 | 8 |
| Sputum | 47 | 48 | 28 | 9 | 10 | 1 |
| PB | 87 | 1 | 1 |  |  |  |
| CSF | 10 | 2 | 1 | 1 |  |  |
| PF | 3 | 2 | 2 |  |  |  |
| Tissue | 3 | 0 |  |  |  |  |
| pus | 1 | 1 |  | 1 |  |  |
| Total | 291 | 194 | 108 | 48 |  |  |

BALF: Bronchoalveolar lavage fluid; PB: peripheral blood; CSF: cerebrospinal fluid; PF: pleural fluid

*Table S2 Resistance mechanism, antibiotic and number of antibiotic resistance genes in ICU patients with pulmonary infection*

| **Resistance Mechanism** | **Drug Class** | **Drug Class** | **AMR Gene Family** | **ARG** | **No.** |
| --- | --- | --- | --- | --- | --- |
| Antibiotic inactivation | Aminoglycoside | aminoglycoside | APH(2''), AAC(6') | *AAC(6')-Ie-APH(2'')-Ia* | 12 |
| [AAC(6')](https://card.mcmaster.ca/ontology/36484" \o "https://card.mcmaster.ca/ontology/36484) | *AAC(6')-Ii* | 3 |
| ANT(4') | *ANT(4')-Ib* | 3 |
| APH(9) | *APH(9)-Ia* | 1 |
| ANT(3'') | *aadA16* | 1 |
| APH(3') | *APH(3')-Ia* | 2 |
| ANT(6) | *aad(6)* | 1 |
| ANT(3'') | *ANT(3'')-IIa* | 3 |
| APH(3'') | *APH(3'')-Ib* | 5 |
| [APH(3')](https://card.mcmaster.ca/ontology/36265" \o "https://card.mcmaster.ca/ontology/36265) | *APH(3')-IIc* | 2 |
| APH(6) | *APH(6)-Id* | 5 |
| Antibiotic efflux | RND efflux pump | *acrD* | 2 |
| Antibiotic target alteration | rRNA methyltransferase | *rmtB* | 1 |
| *armA* | 1 |
| Antibiotic inactivation | β-lactam | carbapenem, penam | Class B beta-lactamases | *blaB* | 4 |
| cephalosporin, penam | OXA beta-lactamase | *OXA-114a* | 1 |
| cephamycin, cephalosporin | DHA beta-lactamase | *DHA-5* | 1 |
| carbapenem, penam, cephalosporin | SHV beta-lactamase | *SHV-80* | 1 |
| Antibiotic target replacement | penam | methicillin resistant PBP2 | *mecA* | 14 |
| Reduced permeability to antibiotic | cephamycin, cephalosporin, penem, penam, carbapenem, monobactam | Reduced permeability to beta-lactams | *OmpK37* | 18 |
| Antibiotic inactivation | MLSB | lincosamide | LNU | *lnuC* | 7 |
| *lnuA* | 1 |
| macrolide | MPH | *mphD* | 1 |
| Antibiotic target alteration | streptogramin, macrolide, lincosamide | rRNA methyltransferase | *ermB* | 32 |
| *ermC* | 20 |
| *ermX* | 58 |
| lincosamide, macrolide | *RlmA(II)* | 4 |
| Antibiotic target alteration | Glycopeptide | glycopeptide | glycopeptide resistance gene cluster, van ligase | *vanM* | 1 |
| Antibiotic efflux | Tetracycline | tetracycline | MFS efflux pump | *tet(38)* | 2 |
| *tet(K)* | 2 |
| tetracycline, glycylcycline | RND efflux pump | *adeA* | 2 |
| *adeB* | 39 |
| *adeC* | 2 |
| tetracycline, glycylcycline | MATE transporter | *mepR* | 1 |
| *mepA* | 5 |
| Antibiotic efflux | Fluoroquinolone | fluoroquinolone | MFS efflux pump | *pmrA* | 5 |
| ABC efflux pump | *patB* | 6 |
| Antibiotic target replacement | Diaminopyrimidine | diaminopyrimidine | trimethoprim resistant dihydrofolate reductase dfr | *dfrC* | 1 |
| *dfrF* | 1 |
| Antibiotic target alteration | Peptide | peptide | pmr phosphoethanolamine transferase | *pmrC* | 1 |
| Antibiotic inactivation | Fosfomycin | fosfomycin | fosfomycin thiol transferase | *fosB3* | 1 |
| Antibiotic efflux | Aminocoumarin antibiotic | aminocoumarin | RND efflux pump | *mdtB* | 1 |
| Antibiotic target alteration | Rifamycin | rifamycin | rpoB | *ropB2* | 1 |
| Antibiotic efflux | Phenicol | phenicol | MFS efflux pump | *cmx* | 22 |
| *fexA* | 1 |
| Antibiotic efflux | Nitroimidazole | nitroimidazole | ABC efflux pump | *msbA* | 1 |
| Antibiotic efflux | Acridine dye | acridine dye | MATE transporter | *emeA* | 2 |
| Antibiotic target alteration | Unclassified | mupirocin | ileS | *mupA* | 8 |
| Antibiotic efflux | triclosan | RND efflux pump | *TriC* | 9 |
| Antibiotic efflux | Multi-drug | tetracycline , fluoroquinolone | RND efflux pump | *adeH* | 5 |
| *adeL* | 1 |
| *adeF* | 9 |
| aminoglycoside , fluoroquinolone | RND efflux pump | *ceoA* | 1 |
| *ceoB* | 7 |
| *opcM* | 1 |
| macrolide , penam | *mtrA* | 1 |
| macrolide , fluoroquinolone | MFS efflux pump | *efmA* | 22 |
| rifamycin , isoniazid | *efpA* | 2 |
| acridine dye, fluoroquinolone | *norA* | 2 |
| *arlR* | 1 |
| verapamil, tetraphenylphosphorchloride, and Hoechst 33342 | *sav1866* | 5 |
| fluoroquinolone, macrolide , rifamycin | ABC efflux pump | *efrA* | 2 |
| *efrB* | 2 |
| penam, fluoroquinolone, macrolide | RND efflux pump | *mdtF* | 3 |
| phenicol, diaminopyrimidine , fluoroquinolone | RND efflux pump | *mexF* | 1 |
| penam, fluoroquinolone, tetracycline , macrolide | MFS efflux pump&RND efflux pump | *evgS* | 1 |
| macrolide , lincosamide, streptogramin , tetracycline | MFS efflux pump | *lmrP* | 1 |
| phenicol , tetracycline, fluoroquinolone , macrolide | RND efflux pump | *smeD* | 1 |
| *smeE* | 12 |
| cephamycin, aminoglycoside, cephalosporin, penam | *smeB* | 17 |
| *smeR* | 1 |
| *smeS* | 5 |
| penam, cephamycin, fluoroquinolone, cephalosporin | *acrF* | 1 |
| macrolide, cephalosporin, aminoglycoside, fluoroquinolone | *AxyY* | 3 |
| tetracycline, penam, rifamycin, glycylcycline, cephalosporin, phenicol, triclosan, fluoroquinolone | *acrA* | 17 |
| *acrB* | 2 |
| diaminopyrimidine, rifamycin, penem, tetracycline, phenicol, carbapenem, macrolide, lincosamide, fluoroquinolone , cephalosporin | *adeI* | 1 |
| *adeJ* | 42 |
| *adeK* | 5 |
| peptide, penam, diaminopyrimidine , sulfonamide, phenicol, fluoroquinolone , cephalosporin, macrolide, tetracycline , monobactam, carbapenem, aminocoumarin , penem, cephamycin | *mexB* | 12 |
| tetracycline, acridine dye, macrolide , phenicol, fluoroquinolone | *mexW* | 2 |
| tetracycline, nitrofuran, fluoroquinolone , glycylcycline, diaminopyrimidine | *oqxB* | 4 |
| Antibiotic target protection | tetracycline, lincosamide, phenicol , pleuromutilin, oxazolidinone, streptogramin, macrolide | ABC-F ATP-binding cassette ribosomal protection protein | *mel* | 24 |
| *msrA* | 1 |
| *lsaA* | 1 |
| *optrA* | 1 |
| Antibiotic target alteration | oxazolidinone, streptogramin, lincosamide , phenicol, pleuromutilin | rRNA methyltransferase | *cfrA* | 1 |

RND: Resistance-nodulation-cell division; MFS: Major facilitator superfamily; ABC: ATP-binding cassette; MATE：Multidrug and toxic compound extrusion; LNU: lincosamide nucleotidyltransferase; MPH: macrolide phosphotransferase; ropB: rifamycin-resistant beta-subunit of RNA polymerase; ileS: antibiotic-resistant isoleucyl-tRNA synthetase; MLSB: Macrolide-Lincosamide-Streptogramin B

*TableS3 Summary of ARGs implicated in drug resistance from bacteria in specimens of ICU patients with pulmonary infection*

| **Species** | **Aminoglycoside** | **β-lactam** | **MLSB** | **Tetracycline** | **Fluoroquinolone** | **Phenicol** | **Multi-drug resistance** | **Unclassified** | **Others** |
| --- | --- | --- | --- | --- | --- | --- | --- | --- | --- |
| *Corynebacterium striatum* | \ | \ | *ermX* (50) | \ | \ | *cmx* (18） | \ | \ | \ |
| *Acinetobacter baumannii* | *ANT(3'')-IIa* (1) | \ | \ | \ | \ | \ | a*deA* (2), *adeB* (39), *adeC* (2), *adeH* (5), *adeJ* (42), *adeK* (5), *adeF* (9), *adeL* (1), *adeI* (1) | \ | \ |
| *Enterococcus faecium* | *AAC(6')-Ii* (3) | \ | *ermB* (28) | \ | \ | \ | *efmA* (22), *efrA* (2), *efrB* (2), *lsaA* (1), *optrA* (1) | \ | *fosB3* (1), *emeA* (2),*vanM* (1), *dfrF* (1) |
| *Streptococcus pneumoniae* | *aad(6)* (1) | \ | *lnuC* (7), *ermC* (1), *RlmA(II)* (4) |  | *pmrA* (5), *patB* (6) |  | *mel* (24) | \ | \ |
| *Stenotrophomonas maltophilia* | *APH(3')-IIc* (2) | \ |  | \ | \ |  | *smeB* (17), *smeD* (1), *smeE* (12), *smeR* (1), s*meS (*5) | \ | \ |
| *Klebsiella pneumoniae* |  | *SHV-80* (1), *OmpK37* (18) |  | \ | \ |  | *acrA* (17) | \ | \ |
| *Staphylococcus epidermidis* | *AAC(6')-Ie-APH(2'')-Ia* (6) | *mecA* (5) | *ermC* (9) | \ | \ | fexA(1) | *norA* (2), *cfrA* (1), *msrA* (1) | *mupA*(6) | *dfrC* (1) |
| *Pseudomonas aeruginosa* | *APH(3'')-Ib* (5), *APH(6)-Id* (4) | \ |  | \ | \ |  | *mexB* (12), *mexF* (1), *mexW* (2) | *TriC* (9) |  |
| *Staphylococcus aureus* | *AAC(6')-Ie-APH(2'')-Ia* (2), *ANT(4')-Ib* (2) | *mecA* (5) | *ermC* (2) | *tet38* (2), *tetK* (1), *mepR* (1), *mepA* (5) | \ | \ | *arlR* (1), *sav1866* (5) | \ | \ |
| *Escherichia coli* | *aadA16* (1), *rmtB* (1) | \ | \ | \ | \ | \ | *acrB* (2), *acrD* (2), *acrF* (1), *oqxB* (4), *mdtF* (3), *evgS* (1) | \ | *mdtB* (1), *msbA* (1), *pmrC* (1) |
| *Staphylococcus haemolyticus* | *AAC(6')-Ie-APH(2'')-Ia* (4), *ANT(4')-Ib* (1) | *mecA* (4) | *ermC* (6) | *tetK* (1) | \ | \ | \ | *mupA* (2) | \ |
| *Elizabethkingia anophelis* |  | *blaB* (4) |  |  |  |  |  | \ | \ |
| *Corynebacterium propinquum* | \ | \ | *ermX* (4) | \ | \ | *cmx* (3) | \ | \ | \ |
| *Enterococcus avium* | \ |  | *ermB* (4) | \ | \ |  |  | \ | \ |
| *Burkholderia cepacia* | \ | \ | \ | \ | \ | \ | *ceoA* (1), *ceoB* (4), *opcM* (1) | \ | \ |
| *Achromobacter xylosoxidans* |  | *OXA-114a* (1) | \ | \ | \ | \ | *AxyY* (3) | \ | \ |
| *Burkholderia multivorans* | \ | \ | \ | \ | \ | \ | *ceoB*(2) | \ | \ |
| *Staphylococcus hominis* | \ | \ | l*unA* (1), *ermC* (2) | \ | \ | \ | \ | \ | \ |
| *Corynebacterium aurimucosum* | \ | \ | *ermX* (2) | \ | \ | \ | \ | \ | \ |
| *Mycobacterium tuberculosis* | \ | \ | \ | \ | \ | \ | \ | \ | *mtrA* (1), *efpA* (2) |
| *Corynebacterium kroppenstedtii* | \ | \ | *ermX* (2) |  |  | *cmx* (1) | \ | \ | \ |
| *Serratia marcescens* | *APH(3'')-Ia* (2) | \ | \ | \ | \ | \ | \ | \ | \ |
| *Burkholderia stabilis* | \ | \ | \ | \ | \ | \ | *ceoB* (1) | \ | \ |
| *Morganella morganii* | \ | *DHA-5* (1) | \ | \ | \ | \ | \ | \ | \ |
| *Nocardia farcinica* | \ | \ | \ | \ | \ | \ | \ |  | *ropB2* (1) |
| *Streptococcus pyogenes* | \ | \ | \ | \ | \ | \ | *lmrP* (1) |  |  |
| *Legionella pneumophila* | *APH(9)-Ia* (1), *armA* (1) | \ | \ | \ | \ | \ | \ | \ | \ |
| *Pseudomonas geniculata* | \ | \ | *mphD* (1) | \ | \ | \ | \ | \ | \ |
| *Burkholderia cenocepacia* | *ANT (3'')-IIa* (2) | \ | \ | \ | \ | \ | \ | \ | \ |
| *Pseudomonas otitidis* | *APH(6)-Id* (1) | \ | \ | \ | \ | \ | \ | \ | \ |
